# Supplementary material for: RETRACTED ARTICLE: Suppression of NF-κB signaling by ECN in an arthritic model of inflammation
Source: Springer Nature journal article supplement (doi:10.1186/s12906-022-03629-7), 2022-06-13
Supplement: MOESM1 [file 23156504]

## Sheet: Paw edema
The effect of the ECN on the chronic CFA-induced paw edema in all the treated groups such as Normal control, CFA treated, Dexa 5mg/kg, and ECN 10mg/kg. The paw edema was measured daily for 21 days.																			The effect of the ECN on the acute CFA-induced paw edema in all the treated groups such as Normal control, CFA treated, Dexa 5mg/kg, and ECN 10mg/kg.
				Normal control			Dexa 5mg/kg														Normal control
			Days	AVG	SD		AVG	SD													S.N	0 hour	2 hour	4 hour	6 hour
			0	2.08333	0.11		2.1	0.1													1	2.2	2.2	2	2.1
			1	2.05	0.098		2.577	0.02													2	1.9	2.3	2	2.2
			2	2.08667	0.1		2.544	0.02													3	2.2	2.1	2.2	2.3
			3	2.04333	0.02		2.647	0.02													4	2.2	2	1.9	2
			4	2.02167	0.09		2.542	0.09													5	2	1.9	2	1.9
			5	1.975	0.09		2.515	0.09													6	1.9	2	2.2	2
			6	2.08667	0.1		2.544	0.02													7	1.9	2	2.2	2
			7	2.04333	0.02		2.54	0.02
			8	2.02167	0.09		2.542	0.09
			9	1.975	0.09		2.515	0.09
			10	2.08667	0.1		2.544	0.02													Avg	2.06667	2.08333	2.05	2.08333
			11	2.04333	0.02		2.52	0.02													SD	0.150555	0.147196	0.122474	0.147196
			12	2.02167	0.09		2.542	0.09													ttest
			13	2.08667	0.1		2.544	0.02
			14	2.04333	0.02		2.72	0.02
			15	2.02167	0.09		2.542	0.09													CFA treated
			16	1.975	0.09		2.515	0.09													S.N	0hour	2 hour	4 hour	6 hour
			17	2.00167	0.09		2.508	0.09													1	2.1	2.38	2.93	3.53
			18	1.97833	0.1		2.51	0.1													2	1.92	2.26	3	3.39
			19	1.96333	0.1		2.53	0.1													3	2.2	2.24	3.2	3.38
			20	1.965	0.03		2.365	0.03													4	2.1	2.1	2.59	3.1
			21	1.99617	0.1		2.32	0.1													5	2.3	2.3	2.45	3.39
																					6	1.9	2.22	2.43	2.59
																					7	2.1	2.34	2.6	3.45
				CFA treated			ECN 10mg/kg
			Days	AVG	SD		AVG	SD
			0	2	0.1		2.1	0.1
			1	2.92	0.02		2.82444	0.02													Avg	2.08857	2.26286	2.74286	3.26143
			2	2.93	0.02		2.86889	0.02													SD	0.142294	0.0912349	0.299317	0.32447
			3	2.936	0.02		2.65444	0.02													ttest
			4	2.998	0.09		2.62667	0.09
			5	3	0.09		2.66555	0.09													Dexa 5mg/kg
			6	2.93	0.02		2.63	0.02													S.N	0hour	2 hour	4 hour	6 hour
			7	2.936	0.02		2.643	0.02													1	2.1	2.05	2.09	2.43
			8	2.998	0.09		2.62667	0.09													2	2.3	2.38	2.31	2.4
			9	3	0.09		2.63	0.09													3	1.9	2.13	2.45	2.29
			10	2.93	0.02		2.6	0.02													4	1.9	2.18	2.28	2.38
			11	2.936	0.02		2.61	0.02													5	2.1	2.06	2.06	2.31
			12	2.998	0.09		2.62667	0.09													6	2.1	2.06	2.1	2.1
			13	2.93	0.02		2.6	0.02													7	1.9	2.23	2.47	2.39
			14	3	0.02		2.83	0.02
			15	2.998	0.09		2.62667	0.09
			16	3	0.09		2.52	0.09
			17	3.007	0.09		2.59	0.09													Avg	2.04286	2.15571	2.25143	2.32857
			18	3.14	0.1		2.589	0.1													SD	0.151186	0.120119	0.171797	0.112462
			19	3.259	0.1		2.58	0.1													ttest	0.570976	0.084698	0.00268434	1.10615e-05
			20	3.348	0.03		2.5	0.03
			21	3.4082	0.1		2.45167	0.1													ECN 10mgg/kg
																					S.N	0h	2 h	4 h	6 h
	The data was represented as the mean ± SD (n=7). (*) p < 0.05 was chosen as a criteria for statistical significance from the CFA treated group.																				1	2	2.95	2.61	2.45
																					2	2.5	3.2	2.54	2.69
																					3	2.1	2.47	2.33	2.41
																					4	2.4	2.22	2.86	2.58
																					5	2.8	3.2	2.72	2.8
																					6	1.9	2.79	2.45	2.91
																					7	2.5	2.48	2.92	2.44
																					AVG	2.31429	2.75857	2.63286	2.61143
																					S.d	0.323669	0.382598	0.214454	0.194887
																					T test	0.117006	0.00594852	0.444639	0.000673654

## Sheet: Allodynia
The effect of the ECN on the chronic CFA-induced mechanical allodynia in all the treated groups such as Normal control, CFA treated, Dexa 5mg/kg, and ECN 10mg/kg. The mechanical allodynia was measured daily for 21 days.																				The effect of the ECN on the acute CFA-induced mechanical allodynia in all the treated groups such as Normal control, CFA treated, Dexa 5mg/kg, and ECN 10mg/kg. The mechanical allodynia was measured at 0 h, 2 h, 4 h, and 6 h.
					Normal control					Dexa 5mg/kg													Normal control
				Days	AVG	SD			Days	AVG	SD												S.N	0hour	2 hour	4 hour	6 hour
				0	4.66667	1.0328			0	5	1.05409												1	4	4	4	6
				1	4.33333	0.816497			1	0.89	0.490918												2	6	6	4	6
				2	4.66667	0.76			2	1.34	0.411501												3	4	4	2	4
				3	4.66667	0.69			3	1.46	0.581569												4	6	4	4	4
				4	4.66667	0.67			4	1.56	0.408792												5	4	2	4	4
				5	5	0.71			5	1.68	0.367575												6	4	4	6	4
				6	5	0.69			6	1.82	0.289828												7	4	6	4	6
				7	5.1	0.9			7	2.1	0.6
				8	5	0.816497			8	2.12	0.490918
				9	5.23	0.67			9	2.2	0.411501
				10	5.23	0.65			10	2.3	0.581569												Avg	4.57143	4.28571	4	4.85714
				11	5.12	0.67			11	2.29	0.408792												SD	1.0328	1.26491	1.26491	1.0328
				12	5.1	0.8			12	2.28	0.367575												ttest
				13	5	0.5			13	2.31	0.289828
				14	5	0.78			14	1.46	0.189737												CFA treated
				15	5.1	0.816497			15	1.9	0.411501												S.N	0hour	2 hour	4 hour	6 hour
				16	5	0.78			16	2.1	0.581569												1	6	0.6	0.14	0.14
				17	5.12	0.67			17	2.2	0.408792												2	4	0.4	0.6	0.16
				18	5.33333	0.7			18	2.3	0.367575												3	6	0.16	0.4	0.4
				19	5.25	0.67			19	2.48	0.289828												4	4	0.14	0.14	0.14
				20	5.2	0.76			20	2.67	0.189737												5	6	0.16	0.16	0.16
				21	5.33333	0.67			21	2.8	0.8												6	6	0.6	0.14	0.14
																							7	4	0.4	0.4	0.16
					CFA treated					ECN 10mg/kg
				Days	AVG	SD			Days	AVG	SD
				0	5	1.05409			0	4.66667	1												Avg	5.14286	0.351429	0.282857	0.185714
				1	0.358	0.200765			1	0.477778	0.0971825												SD	1.06904	0.202602	0.184546	0.0950188
				2	0.322	0.20335			2	0.911111	0.425571												ttest
				3	0.316	0.187806			3	1.08889	0.176383
				4	0.316	0.187806			4	1.13333	0.2												Dexa 5mg/kg
				5	0.307	0.197993			5	1.33333	0.316228												S.N	0hour	2 hour	4 hour	6 hour
				6	0.271	0.1386			6	1.8	0.3												1	6	0.6	1	2
				7	0.26	0.48			7	1.9	0.0971825												2	4	0.4	1.4	2
				8	0.256	0.200765			8	2	0.425571												3	4	0.4	1	1
				9	0.243	0.20335			9	2.1	0.176383												4	6	0.6	1.4	2
				10	0.21	0.187806			10	2.16	0.2												5	6	1	1.4	2
				11	0.2	0.187806			11	2.18	0.316228												6	4	1	1	2
				12	0.197	0.197993			12	2.2	0.3												7	6	0.6	1	1
				13	0.196	0.1386			13	2.24	0.4
				14	0.19	0.4			14	1.4	2.35514e-16
				15	0.189	0.200765			15	1.87	0.34
				16	0.185	0.20335			16	1.95556	0.133333												Avg	5.14286	0.657143	1.17143	1.71429
				17	0.18	0.187806			17	2	0.21												SD	1.06904	0.250713	0.213809	0.48795
				18	0.17	0.187806			18	2.08	0.87												ttest	1	0.0274447	2.49922e-06	3.1651e-06
				19	0.16	0.197993			19	2.1	0.7
				20	0.14	0.1386			20	2.2	0.2												ECN 10mg/kg
				21	0.119	0.1386			21	2.48	0.87												S.N	0 hour	2 hour	4 hour	6 hour
																							1	6	0.4	1	1
																							2	4	0.6	1	1.4
		The data was represented as the mean ± SD (n=7). (*) p < 0.05 was chosen as a criteria for statistical significance from the CFA treated group.																					3	4	1	1	1.4
																							4	4	0.4	1	1.4
																							5	4	0.6	1.4	1.4
																							6	6	0.6	1	1
																							7	4	1	1	2
																							AVG	4.57143	0.657143	1.05714	1.37143
																							S.d	0.9759	0.250713	0.151186	0.335233
																							T test	0.316854	0.0274447	1.80815e-06	1.0998e-06
																						The data was represented as the mean ± SD (n=7). (*) p < 0.05 was chosen as a criteria for statistical significance from the CFA treated group.

## Sheet: Thermal hyperalgesia
The effect of the ECN on the chronic CFA-induced thermal hyperalgesia in all the treated groups such as Normal control, CFA treated, Dexa 5mg/kg, and ECN 10mg/kg. The thermal hyperalgesia was measured daily for 21 days.																											The effect of the ECN on the acute CFA-induced thermal hyperalgesia in all the treated groups such as Normal control, CFA treated, Dexa 5mg/kg, and ECN 10mg/kg. The thermal hyperalgesia was measured at 0 h, 2 h, 4 h, and 6 h.
					Normal control				Dexa 5mg/kg																								Normal control
				0	27.4	1.43		0	26.6	2.01108																								S.N	0hour	2 hour	4 hour	6 hour
				1	26	1.3		1	13.2	2.12																								1	30	31	32	35
				2	26	1.2		2	14.5789	2.49185																								2	24	29	35	33
				3	26.4	1.1		3	15.1078	2																								3	28	35	29	35
				4	26.474	1.21		4	14.6544	2.3																								4	26	30	30	33
				5	27.8	1.2		5	15.0978	2.3																								5	29	26	30	30
				6	27.2	1.1		6	16.4	2.3																								6	26	30	30	33
				7	27.8	1.2		7	16.23	2.3																								7	29	26	30	30
				8	27.2	1.1		8	16.9	2.1
				9	27.8	1.2		9	17.3	2
				10	27.2	1.1		10	18.23	2.14
				11	27.8	1.2		11	18.5	2.17																								Avg	27.4	30.2	31.2	33.2
				12	27.2	1.1		12	18.7667	2.19																								SD	2.40832	3.27109	2.38747	2.04939
				13	27.8	1.2		13	19.3	2.3
				14	27.2	1.1		14	18.56	2.3
				15	27.8	1.2		15	19.34	1.2																							CFA treated
				16	27.8	1.2		16	20	1.1																								S.N	0hour	2 hour	4 hour	6 hour
				17	27.2	1.1		17	21.2	1.2																								1	28	11	15	15
				18	28	1.1		18	21.23	1.1																								2	30	9	9	13
				19	28.4	1.1		19	22	2.13																								3	25	22	19	19
				20	28.2	1.3		20	23	1.9																								4	22	30	28	11
				21	28.4	1.2		21	23.9	2.2																								5	25	20	23	20
																																		6	28	29	31	25
																																		7	23	15	19	9
					CFA treated				ECN 10mg/kg																													20
				0	25.9	2.1		0	26.2222	2.63523																												18
				1	12.4	2		1	13.2222	2.2																												11
				2	12.494	2		2	14.7333	2.2																								Avg	25.8571	19.4286	20.5714	16.1
				3	11	2.25999		3	13.1733	2.43524																								SD	2.91139	8.26352	7.52456	5.10882
				4	12	1.6		4	14.6089	1.2
				5	12	2		5	15.1111	1.3
				6	12.3	1.9		6	16.4	1.4																							Dexa 5mg/kg
				7	12.2	2		7	16.6	1.1																								S.N	0hour	2 hour	4 hour	6 hour
				8	12.4	1.9		8	16.7	1.3																								1	25	30.94	27.5	28
				9	12	2		9	17	1.2																								2	26	26.47	28	35
				10	11.6	1.9		10	18.7	1.23																								3	24	22.47	25	26
				11	11.7	2		11	19	1.9																								4	28	35	27.45	29
				12	11.5	1.9		12	19.3	2.3																								5	26	21.38	25	30
				13	11.3	1.2		13	19.5	2.12																								6	29	20	35	26
				14	10.7	1.9		14	18.78	2.18																								7	24	29.46	29	20
				15	10.3	1.1		15	20	1.87																												28
				16	10	1		16	20.7	1.65																												25
				17	9	1.9		17	21	2.2																												35
				18	8.7	0.8		18	21.3	2.1																								Avg	26	26.5314	28.1357	28.2
				19	8.6	1.3		19	21.7	1.5																								SD	1.91485	5.55914	3.37697	4.51664
				20	7.5	1		20	23	1.1																								ttest	0.915419	0.0835962	0.0319332	2.52269e-05
				21	6.2	1		21	23	1.4
																																	ECN 10mg/kg
	The data was represented as the mean ± SD (n=7). (*) p < 0.05 was chosen as a criteria for statistical significance from the CFA treated group.																																	S.N	oh	2h	4h	6h
																																		1	24	26	23	32
																																		2	24	24	30	27
																																		3	26	21	17	20
																																		4	30	27	26	35
																																		5	29	25	30	26
																																		6	27	23	28	28
																																		7	23	25	20	19
																																		AVG	26.1429	24.4286	24.8571	26.7143
																																		S.d	2.67261	1.98806	5.04739	5.82278
																																		T test	0.85151	0.145569	0.234617	0.00119674
																																	The data was represented as the mean ± SD (n=7). (*) p < 0.05 was chosen as a criteria for statistical significance from the CFA treated group.

## Sheet: Mechanical hyperalgesia
The effect of the ECN on the chronic CFA-induced mechanical hyperalgesia in all the treated groups such as Normal control, CFA treated, Dexa 5mg/kg, and ECN 10mg/kg. The mechanical hyperalgesia was measured daily for 21 days.																							The effect of the ECN on the acute CFA-induced mechanical hyperlagesia in all the treated groups such as Normal control, CFA treated, Dexa 5mg/kg, and ECN 10mg/kg. The mechanical hyperalgesia was measured at 0 h, 2 h, 4 h, and 6 h.
					Normal control					Dexa 5mg/kg																				Normal control
				0	462	32.619			0	434.1	24.7362																			S.N	0hour	2 hour	4 hour	6 hour
				1	379.833	26.9475			1	220.7	37.3156																			1	440	378	389	445
				2	387.333	14.5144			2	237.4	22.9599																			2	490	445	402	419
				3	388.333	16.7889			3	248	22.0101																			3	450	390	406	439
				4	391.167	13.9917			4	250.5	22.9068																			4	460	389	420	522
				5	410.167	29.1302			5	251.6	22.6627																			5	510	443	442	499
				6	418.5	27.7543			6	270.5	37.9041																			6	422	410	390	413
				7	420	32.619			7	275	24.7362																			7	422	410	390	413
				8	421	26.9475			8	280	37.3156
				9	412	14.5144			9	280	22.9599
				10	423	16.7889			10	284	22.0101
				11	412	13.9917			11	285	22.9068																			Avg	462	409.167	408.167	456.167
				12	423	29.1302			12	285	22.6627																			SD	32.619	28.8958	20.1238	44.346
				13	423	29.1302			13	286	22.6627																			ttest
				14	422.667	27.7543			14	235.7	37.9041
				15	420	43			15	240	24.7362																			CFA treated
				16	426.167	56.4568			16	263	37.3156																			S.N	0hour	2 hour	4 hour	6 hour
				17	422	30			17	270	22.9599																			1	440	119	121	161
				18	433.167	41.7584			18	278.3	22.0101																			2	399	102	140	167
				19	430	32			19	280	22.9068																			3	450	119	150	110
				20	433	32			20	284	22.6627																			4	460	140	111	79
				21	452.833	45.3229			21	286	37.9041																			5	412	150	120	125
																														6	422	143	131	160
																														7	416	120	140	170
					CFA treated					ECN 10mg/kg
				0	427.2	23.0063			0	434.778	15.8412
				1	150.9	31.3597			1	176.75	37.2511																			Avg	428.429	127.571	130.429	138.857
				2	149.1	41.4473			2	201.333	32.9697																			SD	22.0896	17.0964	13.7944	34.8971
				3	148.2	21.4569			3	229.222	33.4357																			ttest
				4	145.5	28.1829			4	250.333	29.1505
				5	144.5	25.1761			5	251.8	43.0023																			Dexa 5mg/kg
				6	141.5	46.9071			6	269.222	25.0089																			S.N	0hour	2 hour	4 hour	6 hour
				7	137	23.0063			7	271	15.8412																			1	425	250	268	243
				8	138	31.3597			8	275	37.2511																			2	434	260	220	424
				9	141	41.4473			9	273	32.9697																			3	480	300	270	237
				10	139	21.4569			10	278	33.4357																			4	423	180	197	247
				11	145	28.1829			11	275	29.1505																			5	412	190	240	323
				12	144	25.1761			12	280	43.0023																			6	414	220	260	306
				13	145	25.1761			13	280	43.0023																			7	422	245	270	224
				14	137.5	46.9071			14	232.778	25.0089
				15	137	23.0063			15	235	15.8412
				16	140.6	31.3597			16	258.445	37.2511
				17	135	41.4473			17	260	32.9697																			Avg	430	235	246.429	286.286
				18	139.2	21.4569			18	273.833	33.4357																			SD	23.2164	41.7333	28.7046	71.2126
				19	130	28.1829			19	275	29.1505																			ttest	0.898923	3.93421e-05	5.33279e-07	0.000354662
				20	110	25.1761			20	280	43.0023
				21	97.7	46.9071			21	282.555	25.0089																			ECN 10mg/kg
																														S.N	0h	2h	4h	6h
		The data was represented as the mean ± SD (n=7). (*) p < 0.05 was chosen as a criteria for statistical significance from the CFA treated group.																												1	449	217	213	247
																														2	423	220	242	276
																														3	442	164	270	260
																														4	442	242	260	272
																														5	423	250	272	290
																														6	460	218	282	260
																														7	425	260	250	250
																														AVG	437.714	224.429	255.571	265
																														S.d	14.4651	31.6115	23.1794	15.2425
																														T test	0.370483	1.19602e-05	3.75587e-08	1.4603e-06
																												The data was represented as the mean ± SD (n=7). (*) p < 0.05 was chosen as a criteria for statistical significance from the CFA treated group.

## Sheet: Arthritic index
		Effect of ECN treatment on arthritic index following CFA-induced arthritis.
		Normal control
		S.No	0 time	3 days	6 days	9 days	12 days	15 days	18 days	21 days
		1	0	0	0	0	0	0	0	0
		2	0	0	0	0	0	0	0
		3	0	0	0	0	0	0	0	0
		4	0	0	0	0	0	0	0	0
		5	0	0	0	0	0	0	0
		6	0	0	0	0	0	0	0	0
		7	0	0	0	0	0	0	0	0
		AVG	0	0	0	0	0	0	0	0
		SD	0	0	0	0	0	0	0	0
		tt
		CFA treated
		S.No	0 time	3 days	6 days	9 days	12 days	15 days	18 days	21 days
		1	0	0.5	2	2	2	3	3	3
		2	0	0.5	1	2	1	2	2	3
		3	0	0.5	2	3	2	2
		4	0	1	2	3	3	3	2	3
		5	0	1	3	2	2	1	2	3
		6	0	3	3	3	3	3	3	3
		7	0	3	3	2	3	3	3	3
		AVG	0	1.35714	2.28571	2.42857	2.28571	2.42857	2.5	3
		SD	0	1.14434	0.755929	0.534522	0.755929	0.786796	0.547723	0
		tt
		Dexa 5mg/kg
		S.No	0 time	3 days	6 days	9 days	12 days	15 days	18 days	21 days
		1	0	0.5	0.5	1	0.5	2	2	2
		2	0	1	2	1	0.5	1	1	0.5
		3	0	3	2	0.5	1	1	1	0.5
		4	0	0.5	3	2	1	2	2	0.5
		5	0	1	3	1	0.5	1	1	1
		6	0	3	2	1	1	0.5	0.5	0.5
		7	0	1	3	2	0.5	2	2	1
															0	normal
															0.5	Erythema and edema in only one digit
		AVG	0	1.42857	2.21429	1.21429	0.714286	1.35714	1.35714	0.857143					1	Erythema and mild edema of the footpad or ankle or two to five digits
		SD	0	1.09653	0.906327	0.566947	0.267261	0.626783	0.626783	0.556349					2	Erythema and moderate edema of two joints (footpad, ankle, two to five digits)
		tt		0.907059	0.875444	0.00141279	0.000227284	0.0155171	0.00524891	1.4051e-06					3	Erythema and severe edema of the entire paw
															4	Reduced swelling and deformation leading to incapacitated limb
		ECN 10mg/kg
		S.N	0h	3day	6 day	9 day	12 day	15 day	18 day	21 day
		1	0	2	3	2	2	2	2	1
		2	0	0	0.5	1	0.5	1	1	1
		3	0	3	2	1	0.5	2	1	0.5
		4	0	0	0	2	0.5	1	1	1
		5	0	2	1	2	1	2	1	0.5
		6	0	0.5	0.5	1	0.5	1	0.5	0.5
		7	0	3	1	2	1	2	1	1
		AVG	0	1.5	1.14286	1.57143	0.857143	1.57143	1.07143	0.785714
		S.d	0	1.32288	1.02933	0.534522	0.556349	0.534522	0.449868	0.267261
		T test		0.832551	0.0355521	0.0110667	0.00167841	0.0345005	0.000308885	4.89658e-10
	The data was represented as the mean ± SD (n=7). (*) p < 0.05 was chosen as a criteria for statistical significance from the CFA treated group.

## Sheet: Distress symtpoms
				The effect of the ECN treatment on the distress symptoms (Dull/Ruffled coat, change in temperament, reluctance to move) following CFA-induced arthritis.
				Normal	0 time	3 days	6 days	9 day	12 day	15 day	18 day	21 day				CFA	0 time	3 day	6 day	9 day	12 day	15 day	day 18	day 21
				General health	0	0	0	0	0	0	0	0				General health	0	0	0	0	0	1	2	2
				Hair loss	0	0	0	0	0	0	0	0				Hair loss	0	0	2	0	0	2	3	3
				Piloerection	0	0	0	0	0	0	0	0				Piloerection	0	1	3	2	2	3	3	3
				Gait weakness	0	0	0	0	0	0	0	0				Gait weakness	0	0	0	2	2	1	2	2
				Food uptake	0	0	0	0	0	0	0	0				Food uptake	0	0	0	0	1	0	1	1
				Water up take	0	0	0	0	0	0	0	0				Water up take	0	0	0	0	1	0	0	1
				gastro	0	0	0	0	0	0	0	0				gastro	0	0	0	1	1	1	0	2
				General health	0	0	0	0	0	0	0	0				General health	0	0	0	1	1	3	3	3
				Hair loss	0	0	0	0	0	0	0	0				Hair loss	0	0	2	2	1	3	2	3
				Piloerection	0	0	0	0	0	0	0	0				Piloerection	0	0	3	3	1	3	3	2
				Gait weakness	0	0	0	0	0	0	0	0				Gait weakness	0	0	0	1	1	2	2	3
				Food uptake	0	0	0	0	0	0	0	0				Food uptake	0	0	0	0	0	0	1	1
				Water up take	0	0	0	0	0	0	0	0				Water up take	0	0	0	0	0	0	1	1
				gastro	0	0	0	0	0	0	0	0				gastro	0	0	0	1	0	1	0	2
				General health	0	0	0	0	0	0	0	0				General health	0	0	0	1	1	2	3	2
				Hair loss	0	0	0	0	0	0	0	0				Hair loss	0	0	0	3	2	3	2	3
				Piloerection	0	0	0	0	0	0	0	0				Piloerection	0	0	1	2	3	3	3	3
				Gait weakness	0	0	0	0	0	0	0	0				Gait weakness	0	0	1	1	2	1	1	1
				Food uptake	0	0	0	0	0	0	0	0				Food uptake	0	2	0	0	0	2	1	2
				Water up take	0	0	0	0	0	0	0	0				Water up take	0	0	0	0	0	0	0	0
				gastro	0	0	0	0	0	0	0	0				gastro	0	0	1	0	0	0	1	1
				General health	0	0	0	0	0	0	0	0				General health	0	0	1	2	1	2	2	2
				Hair loss	0	0	0	0	0	0	0	0				Hair loss	0	0	0	3	2	3	3	3
				Piloerection	0	0	0	0	0	0	0	0				Piloerection	0	0	2	2	3	3	3	3
				Gait weakness	0	0	0	0	0	0	0	0				Gait weakness	0	0	0	1	0	1	1	2
				Food uptake	0	0	0	0	0	0	0	0				Food uptake	0	0	0	0	0	0	0	0
				Water up take	0	0	0	0	0	0	0	0				Water up take	0	0	0	1	0	0	0	0
				gastro	0	0	0	0	0	0	0	0				gastro	0	0	1	1	1	3	3	3
				General health	0	0	0	0	0	0	0	0				General health	0	0	1	2	2	2	2	3
				Hair loss	0	0	0	0	0	0	0	0				Hair loss	0	0	0	1	3	1	3	2
				Piloerection	0	0	0	0	0	0	0	0				Piloerection	0	0	1	3	2	3	3	2
				Gait weakness	0	0	0	0	0	0	0	0				Gait weakness	0	0	0	0	1	2	2	0
				Food uptake	0	0	0	0	0	0	0	0				Food uptake	0	0	0	0	2	0	1	1
				Water up take	0	0	0	0	0	0	0	0				Water up take	0	2	0	0	0	0	1	1
				gastro	0	0	0	0	0	0	0	0				gastro	0	0	0	0	0	3	1	3
				General health	0	0	0	0	0	0	0	0				General health	0	0	0	2	2	3	0	2
				Hair loss	0	0	0	0	0	0	0	0				Hair loss	0	0	0	1	2	3	3	3
				Piloerection	0	0	0	0	0	0	0	0				Piloerection	0	0	0	3	3	3	3	3
				Gait weakness	0	0	0	0	0	0	0	0				Gait weakness	0	0	0	1	3	2	3	2
				Food uptake	0	0	0	0	0	0	0	0				Food uptake	0	0	0	0	0	0	0	1
				Water up take	0	0	0	0	0	0	0	0				Water up take	0	2	0	1	0	0	1	1
				gastro	0	0	0	0	0	0	0	0				gastro	0	0	1	1	3	2	3	2
				General health	0	0	0	0	0	0	0	0				General health	0	0	2	1	1	3	1	3
				Hair loss	0	0	0	0	0	0	0	0				Hair loss	0	0	3	2	3	2	3	3
				Piloerection	0	0	0	0	0	0	0	0				Piloerection	0	3	2	3	2	3	3	2
				Gait weakness	0	0	0	0	0	0	0	0				Gait weakness	0	0	0	1	1	2	2	3
				Food uptake	0	0	0	0	0	0	0	0				Food uptake	0	0	0	0	1	0	0	1
				Water up take	0	0	0	0	0	0	0	0				Water up take	0	0	1	0	0	0	0	1
				gastro	0	0	0	0	0	0	0	0				gastro	0	1	1	2	2	2	1	3
				General health	0	0	0	0	0	0	0	0				General health	0	0	1	2	3	3	3	2
				Hair loss	0	0	0	0	0	0	0	0				Hair loss	0	0	3	2	2	3	3	3
				Piloerection	0	0	0	0	0	0	0	0				Piloerection	0	3	2	3	3	3	3	3
				Gait weakness	0	0	0	0	0	0	0	0				Gait weakness	0	0	3	1	3	1	2	1
				Food uptake	0	0	0	0	0	0	0	0				Food uptake	0	0	0	0	2	0	0	0
				Water up take	0	0	0	0	0	0	0	0				Water up take	0	0	0	0	1	0	0	0
				gastro	0	0	0	0	0	0	0	0				gastro	0	1	0	1	1	2	1	2
				avg	0	0	0	0	0	0	0	0				avg	0	0.267857	0.678571	1.125	1.32143	1.625	1.67857	1.91071
				sd	0	0	0	0	0	0	0	0				sd	0	0.725912	0.992831	1.02802	1.08052	1.22938	1.17716	1.01403
				ECN												positive
																	0 time	3 d	6 d	9 d	12d	15d	18d	21dy
				ECN	0 time	3day	6 day	9 day	12 d	15 day	18 day	21dy				General health	0	1	1	0	1	1	1	1
				General health	0	1	1	0	1	1	1	1				Hair loss	0	1	1	1	0	1	2	3
				Hair loss	0	1	1	1	0	1	2	2				Piloerection	0	1	1	1	1	2	2	3
				Piloerection	0	2	1	1	1	2	2	2				Gait weakness	0	0	0	1	0	1	1	1
				Gait weakness	0	1	0	1	0	1	1	1				Food uptake	0	0	0	0	0	0	0	0
				Food uptake	0	0	0	0	0	0	0	0				Water up take	0	0	0	2	0	0	0	0
				Water up take	0	0	0	2	0	0	0	0				gastro	0	0	0	1	1	1	1	1
				gastro	0	0	0	1	1	1	1	1				General health	0	0	0	1	1	0	1	1
				General health	0	1	0	2	1	0	1	1				Hair loss	0	0	0	1	1	1	2	3
				Hair loss	0	1	0	2	1	1	2	2				Piloerection	0	0	0	0	1	1	1	3
				Piloerection	0	1	0	0	1	1	1	2				Gait weakness	0	0	0	0	1	1	1	1
				Gait weakness	0	1	0	0	1	1	1	1				Food uptake	0	0	0	0	1	0	0	0
				Food uptake	0	0	0	0	1	0	0	0				Water up take	0	0	0	1	0	0	0	0
				Water up take	0	0	0	1	0	0	0	0				gastro	0	0	0	1	0	1	2	2
				gastro	0	0	0	1	0	1	2	2				General health	0	0	0	1	0	1	1	3
				General health	0	0	0	1	0	1	1	2				Hair loss	0	1	1	1	0	1	1	3
				Hair loss	0	1	1	1	0	1	1	2				Piloerection	0	1	1	0	0	2	1	3
				Piloerection	0	1	1	1	0	2	1	3				Gait weakness	0	0	0	0	0	1	1	1
				Gait weakness	0	0	0	1	0	1	1	1				Food uptake	0	0	0	0	0	0	0	0
				Food uptake	0	0	0	0	0	0	0	0				Water up take	0	0	0	0	0	0	0	0
				Water up take	0	0	0	0	0	0	0	0				gastro	0	0	0	1	1	0	1	2
				gastro	0	0	0	1	1	0	1	2				General health	0	0	0	1	1	1	1	1
				General health	0	0	0	1	1	1	2	1				Hair loss	0	1	1	1	1	1	1	2
				Hair loss	0	1	1	1	1	1	2	2				Piloerection	0	0	1	0	1	1	1	3
				Piloerection	0	0	1	0	1	1	2	2				Gait weakness	0	0	0	0	0	1	1	3
				Gait weakness	0	0	0	0	0	1	1	2				Food uptake	0	0	0	0	0	1	1	3
				Food uptake	0	0	0	0	0	1	1	2				Water up take	0	0	0	1	0	0	0	1
				Water up take	0	0	0	1	0	0	0	1				gastro	0	0	0	1	0	1	0	0
				gastro	0	0	0	1	0	1	0	0				General health	0	0	0	1	1	1	1	2
				General health	0	0	0	1	1	1	1	2				Hair loss	0	0	0	1	1	1	1	2
				Hair loss	0	1	1	1	1	1	1	2				Piloerection	0	0	0	0	2	2	2	3
				Piloerection	0	1	1	0	2	2	2	3				Gait weakness	0	0	0	0	1	1	2	2
				Gait weakness	0	1	1	0	1	1	2	2				Food uptake	0	0	0	0	0	1	0	0
				Food uptake	0	0	0	0	0	1	0	0				Water up take	0	0	0	0	0	0	0	0
				Water up take	0	0	0	0	0	0	0	0				gastro	0	0	0	0	1	1	1	2
				gastro	0	0	0	0	1	1	1	2				General health	0	0	0	0	1	2	2	2
				General health	0	0	0	0	1	2	2	2				Hair loss	0	0	0	0	2	2	2	2
				Hair loss	0	0	0	0	2	2	2	2				Piloerection	0	1	1	0	2	1	2	2
				Piloerection	0	1	1	0	2	1	2	2				Gait weakness	0	0	1	0	1	2	2	2
				Gait weakness	0	0	1	0	1	2	2	2				Food uptake	0	0	0	0	0	1	1	1
				Food uptake	0	0	0	0	0	1	1	1				Water up take	0	0	0	0	0	0	0	0
				Water up take	0	0	0	0	0	0	0	0				gastro	0	0	0	0	0	0	0	0
				gastro	0	0	0	0	0	0	0	0				General health	0	0	0	0	0	0	0	0
				General health	0	0	0	0	1	0	0	0				Hair loss	0	0	0	0	0	1	1	1
				Hair loss	0	0	1	0	1	1	1	1				Piloerection	0	0	0	0	0	1	1	1
				Piloerection	0	0	1	0	1	1	1	1				Gait weakness	0	0	0	1	0	1	1	1
				Gait weakness	0	0	1	1	1	1	1	1				Food uptake	0	0	0	1	0	0	1	1
				Food uptake	0	0	0	1	0	0	1	1				Water up take	0	0	0	1	0	0	0	0
				Water up take	0	0	0	1	0	0	0	0				gastro	0	0	0	0	1	0	0	0
				gastro	0	0	0	0	1	0	0	0				General health	0	0	0	0	1	1	1	1
				General health	0	0	1	2	2	1	1	1				Hair loss	0	0	1	0	1	2	2	2
				Hair loss	0	0	1	2	2	2	2	2				Piloerection	0	1	1	0	1	3	3	1
				Piloerection	0	1	1	1	2	3	3	2				Gait weakness	0	0	0	0	1	0	1	1
				Gait weakness	0	0	1	1	1	1	2	2				Food uptake	0	0	0	0	0	0	0	0
				Food uptake	0	0	0	0	0	0	0	0				Water up take	0	0	0	0	0	0	0	0
				Water up take	0	0	0	0	0	0	0	0				gastro	0	0	0	0	1	0	1	1
				gastro	0	0	0	0	1	1	1	1				avg	0	0.142857	0.196429	0.392857	0.535714	0.803571	0.928571	1.32143
				avg	0	0.303571	0.339286	0.571429	0.660714	0.839286	1	1.19643				s.d	0	0.353094	0.400892	0.528413	0.601945	0.724121	0.759357	1.09722
				sd	0	0.501621	0.477752	0.656634	0.668153	0.707795	0.80904	0.902917				ttest		0.24905	0.00103835	6.43841e-06	6.08742e-06	3.593e-05	0.000112368	0.00386448
				ttest		0.762545	0.023078	0.000952276	0.000170859	6.70691e-05	0.000558376	0.000145129
				The data was represented as the mean ± SD (n=7). (*) p < 0.05 was chosen as a criteria for statistical significance from the CFA treated group.

## Sheet: IL-1B
				The influence of the ECN on the inflammatory cytokines such as IL-1β following CFA-induced arthritis.
				Paw	AVG1	AVG2	AVG3	SUMAVG	SD	CONC	Conc (%)	SD (%%)
				Normal	0.078	0.092	0.073	0.081	0.00984886	36.5263	14.6599	0.00984886
				CFA	0.467	0.51	0.478	0.485	0.0223383	249.158	100	0.0223383
				Dexa	0.184	0.195	0.186	0.188333	0.00585947	93.0175	38.8316	0.00585947
				ECN	0.178	0.184	0.165	0.175667	0.00971253	86.3509	36.2199	0.00971253
				The assay was performed in triplicate for all the treated group. (*) p < 0.05 was chosen as a criteria for statistical significance from the CFA treated group.

## Sheet: TNF-a
					The influence of the ECN on the inflammatory cytokines such as TNF-a following CFA-induced arthritis.
					Paw	AVG1	AVG2	AVG3	SUMAVG	SD	CONC	Conc (%)	SD (%%)
					Normal	0.098	0.097	0.1069	0.100633	0.00545008	46.8596	18.981	0.00545008
					CFA	0.469	0.492	0.481	0.480667	0.0115036	246.877	100	0.0115036
					Dexa	0.169	0.167	0.16	0.165333	0.00472582	80.9123	34.3967	0.00472582
					ECN	0.196	0.25	0.23	0.225333	0.0273008	112.491	46.8793	0.0273008
					The assay was performed in triplicate for all the treated group. (*) p < 0.05 was chosen as a criteria for statistical significance from the CFA treated group.

## Sheet: IHC scoring
						Score	Positive cell %
						0	0
						1	less than 1
						2	1 to 10
						3	11 to 33
						4	34 to 66
						5	greater than or equal to 67
		Effect of ECN (10 mg/kg) treatment on expression of COX-2 using immunohistochemical analysis.									Effect of ECN (10 mg/kg) treatment on expression of NF-kB using immunohistochemical analysis.									Effect of ECN (10 mg/kg) treatment on expression of TNF-a using immunohistochemical analysis.												Effect of ECN (10 mg/kg) treatment on expression of p-JNK using immunohistochemical analysis.
			Sr No	Normal	Negative	Dexa	ECN				Sr No	Normal	Negative	Dexa	ECN					Sr No	Normal	Negative	Dexa	ECN								Sr No	Normal	Negative	Dexa	ECN
			1	1	5	2	3				1	1	4	1	2					1	2	4	2	3								1	2	5	2	3
			2	2	4	2	3				2	2	5	3	2					2	1	5	1	2								2	1	5	3	2
			3	1	4	2	2				3	1	4	2	2					3	1	4	3	2								3	2	4	2	2
			4	1	5	2	3				4	1	5	1	1					4	2	3	1	2								4	2	5	3	2
			5	1	5	3	2				5	1	4	2	2					5	2	5	2	1								5	1	5	2	2
			avg	1.2	4.6	2.2	2.6				avg	1.2	4.4	1.8	1.8					avg	1.6	4.2	1.8	2								avg	1.6	4.8	2.4	2.2
			s.d	0.447214	0.547723	0.447214	0.547723				s.d	0.447214	0.547723	0.83666	0.447214					s.d	0.547723	0.83666	0.83666	0.707107								s.d	0.547723	0.447214	0.547723	0.447214
			t-test								t-test									t-test												t-test
	The assay was performed in triplicate for all the treated group. (*) p < 0.05 was chosen as a criteria for statistical significance from the CFA treated group.									The assay was performed in triplicate for all the treated group. (*) p < 0.05 was chosen as a criteria for statistical significance from the CFA treated group.										The assay was performed in triplicate for all the treated group. (*) p < 0.05 was chosen as a criteria for statistical significance from the CFA treated group.										The assay was performed in triplicate for all the treated group. (*) p < 0.05 was chosen as a criteria for statistical significance from the CFA treated group.

## Sheet: Radiological scoring
Effect of ECN on radiological analysis following CFA-induced arthritis.
Normal control
Features	scoring	AVG
normal	0	0
Soft tissue swelling only	1	0
Soft tissue swelling and early joint erosion	2	0
Severe joint erosion or significant osteophyte formation	3	0
	Avg	0
	SD	0
	t test
ECN
Features	scoring	AVG
normal	0	0
Soft tissue swelling only	1	0
Soft tissue swelling and early joint erosion	2	1.22
Severe joint erosion or significant osteophyte formation	3	0
	sum	1.22
		1.21
		1.23
	avg	1.22
	SD	0.01
	tt
CFA control				Dexa
Features	scoring	AVG		Features	scoring	AVG
normal	0	0		normal	0	0
Soft tissue swelling only	1	1		Soft tissue swelling only	1	0
Soft tissue swelling and early joint erosion	2	2		Soft tissue swelling and early joint erosion	2	0
Severe joint erosion or significant osteophyte formation	3	1.5		Severe joint erosion or significant osteophyte formation	3	1.2
	sum	4.5			sum	1.2
		4.6				1.18
		4.5				1.22
	avg	4.53333			avg	1.2
	st	0.057735			st	0.02
					tt	7.52078e-08
The assay was performed in triplicate for all the treated group. (*) p < 0.05 was chosen as a criteria for statistical significance from the CFA treated group.

[truncated: 9 more sheets: Comet data, NO, GST, GSH, Catalase, SOD, MDA, Table 1, Table 2]
